## Increased Cardiovascular Risk in Hypertriglyceridemic Patients With Statin-Controlled LDL Cholesterol

Gregory A. Nichols,<sup>1</sup> Sephy Philip,<sup>2</sup> Kristi Reynolds,<sup>3</sup> Craig B. Granowitz,<sup>2</sup> and Sergio Fazio<sup>4</sup>

<sup>1</sup>Kaiser Permanente Center for Health Research, Portland, Oregon 97227-1098; <sup>2</sup>Amarin Pharma Inc., Bedminster, New Jersey 07921; <sup>3</sup>Kaiser Permanente Southern California, Pasadena, California 91101; and <sup>4</sup>Oregon Health & Science University, Portland, Oregon 97239

**Context:** Real-world evidence of the relationship between high triglyceride (TG) levels and cardiovascular (CV) disease (CVD) risk among statin-treated patients with low-density lipoprotein cholesterol (LDL-C) control is lacking.

**Objective:** We aimed to compare CVD and mortality risk between patients with high vs normal TGs.

**Design:** Longitudinal observational cohort study.

**Setting:** Integrated delivery system.

**Patients:** Patients aged  $\geq 45$  years whose TG level was either  $< 150$  mg/dL (normal) or between 200 and 499 mg/dL (high) in 2010, were taking only statins, had LDL-C values 40 to 100 mg/dL, and had diagnosed CVD.

**Outcome Measures:** Patients were followed through December 2016. Our primary outcomes were a composite of nonfatal myocardial infarction (MI), nonfatal stroke, unstable angina, coronary revascularization, and all-cause mortality and a second composite adding peripheral revascularization and aneurysm repair. We compared multivariable-adjusted incidence rates and rate ratios (RRs) of the outcomes and their components.

**Results:** A total of 14,481 patients comprised the normal TG group, and 2702 patients were in the high TG group. Multivariable-adjusted incidence of the second composite was 10% greater in the high TG group [50.9/1000 person-years, 95% CI 47.0 to 55.2 vs 46.5, 44.8 to 48.2, RR 1.10, 95% CI 1.00 to 1.20,  $P = 0.041$ ]. The difference was driven by nonfatal MI (RR 1.20, 95% CI 1.00 to 1.45,  $P = 0.045$ ), coronary revascularization (RR 1.18, 95% CI 1.00 to 1.40,  $P = 0.045$ ), and peripheral revascularization (RR 1.56, 95% CI 1.14 to 2.13,  $P = 0.006$ ).

**Conclusions:** CVD risk in high-risk statin-treated patients with atherosclerotic CVD was associated with high TG levels. (*J Clin Endocrinol Metab* 103: 3019–3027, 2018)

The large reductions in cardiovascular (CV) disease (CVD) event and mortality rates that have occurred during the last 50+ years (1–4) are, at least in part, attributable to the clear-cut benefits of increasingly aggressive management of low-density lipoprotein

cholesterol (LDL-C) levels (5). Nevertheless, substantial CV risk remains among the estimated 92 million US adults with CVD in one of its many forms (6), and CVD continues to be the leading cause of mortality in the United States (7). Elevated triglyceride (TG) levels, which

ISSN Print 0021-972X ISSN Online 1945-7197

Printed in USA

Copyright © 2018 Endocrine Society

Received 26 February 2018. Accepted 23 May 2018.

First Published Online 29 May 2018

Abbreviations: ASCVD, atherosclerotic cardiovascular disease; BMI, body mass index; CKD, chronic kidney disease; CV, cardiovascular; CVD, cardiovascular disease; eGFR, estimated glomerular filtration rate; EHR, electronic health record; HDL-C, high-density lipoprotein cholesterol; KPNC, Kaiser Permanente Northwest; KPSC, Kaiser Permanente Southern California; LDL-C, low-density lipoprotein cholesterol; MI, myocardial infarction; REDUCE-IT, Reduction of Cardiovascular Events with EPA-Intervention Trial; RR, rate ratio; TG, triglyceride.

is a common finding in clinics, may identify individuals at increased CVD risk and represent an attractive target for additional CVD risk reduction, especially among patients with well-controlled LDL-C on statin therapy (8). *Post hoc* analyses of clinical trials of LDL-C lowering have suggested that TG levels are associated with CVD and mortality in the context of statin treatment (9–12), and a recent report shows a causal relationship between TG levels and CVD (13). However, real-world evidence of the relationship between elevated TG levels and CVD among statin-treated patients who have succeeded in attaining LDL-C control is lacking. Therefore, we conducted an observational longitudinal cohort study using the electronic health records (EHRs) of patients in an integrated delivery system who were at high risk for CVD events and who had statin-controlled LDL-C to determine whether the presence of high TG levels influences CV risk in real-world clinical practice.

## Materials and Methods

Kaiser Permanente is an integrated delivery system that provides medical care to individuals in eight semiautonomous regions around the country. For this study, we combined the EHR data of the Kaiser Permanente Northwest (KPNW) and Southern California (KPSC) regions that collectively serve ~4.5 million members. Both organizations use an EPIC<sup>®</sup>-based EHR that combines seamlessly with enrollment, laboratory, and pharmacy information systems to develop a comprehensive dataset that is standardized into a common data model (14). The KPNW Institutional Review Board approved the study with a waiver of informed consent; the KPSC Institutional Review Board ceded review to KPNW.

The sample for the current study was selected to simulate the inclusion and exclusion criteria of patients with atherosclerotic CVD (ASCVD) participating in the Reduction of Cardiovascular Events with EPA-Intervention Trial (REDUCE-IT), a Phase 3b trial evaluating the safety and efficacy of 4 g daily of pure eicosapentaenoic acid, a prescription omega-3 fatty acid, as an adjunct to statin therapy in reducing CV events in a high-risk patient population with persistent hypertriglyceridemia; details of the study design have been previously published (15).

To mimic the REDUCE-IT population, we identified all KPNW and KPSC patients, aged 45 and older with ASCVD who had a TG level <500 mg/dL in 2010, were receiving statin therapy but no other anti-hyperlipidemic agent, had LDL-C values between 40 and 100 mg/dL, and had a charted diagnosis of myocardial infarction (MI; ICD-9-CM 410.x or 412), stroke (434.x), acute coronary syndrome (411.1), or peripheral artery disease (443.8x, 443.9x). From the 48,141 who met these criteria, we identified high (200 to 499 mg/dL, n = 6737) and normal (<150 mg/dL, n = 34,095) TG groups. Again following REDUCE-IT, we excluded individuals with a life-threatening illness [AIDS/HIV (ICD-9-CM 042.x, 043.x, 044.x), malignant cancer (140.xx–239.xx), or end-stage renal disease (585.6)], planned surgery (defined for this study as any surgery within 6 months of the date of TG testing), liver disease (cirrhosis, hepatitis, alanine transaminase or aspartate transaminase >3× upper limit of normal, or bilirubin >2× upper limit of normal),

kidney dysfunction (albumin level <3.4 g/dL, blood urea nitrogen level >20 mg/dL, or a serum creatinine >1.3 mg/dL in men or 1.1 mg/dL in women), or thyroid function abnormalities (thyroid stimulating hormone values <0.4 or >4.2 mU/L, with or without treatment). Although REDUCE-IT excluded New York Heart Association Class IV heart failure only, our data did not contain a heart-failure class. Therefore, we excluded all individuals with a charted heart-failure diagnosis (ICD-9-CM 428.x). These criteria resulted in the exclusion of 4035 patients from the high TG group and 19,614 from the normal TG group for final sample sizes of 2702 and 14,481 patients in the high and normal TG group, respectively. A complete consort diagram of the inclusion and exclusion criteria is provided in Fig. 1.

## Index date and follow-up period

If multiple TG results were available in 2010, all had to be <150 mg/dL for a patient to qualify for the normal TG group, and all had to be 200 to 499 mg/dL for a patient to qualify for the high TG group. We used the first available TG level in 2010 as the index value. We defined the baseline period (for baseline data collection) as 6 months before and 6 months after the index TG. To avoid immortal time bias that would result from including the 6-month post-index TG level as follow-up time, we defined the index date for beginning follow-up as the date of the index TG plus 182 days. Patients were followed from the index date through December 2016 for a maximum follow-up period of 6.5 years. Data were censored on 31 December 2016 or when a patient died or left the health plan.

## Study outcomes and covariates

We prespecified two composite outcomes. The first included all-cause mortality and first occurrence of a nonfatal MI, nonfatal stroke, coronary revascularization, or unstable angina. The second added peripheral revascularization and aneurysm repair to the first. In secondary analyses, we evaluated each of the individual components of the composite outcomes separately.

We assessed baseline demographics (age, sex, race), clinical characteristics [smoking status, body mass index (BMI), systolic and diastolic blood pressure, lipid fractions, and comorbidities] as potential covariates and compared them between the high and normal TG groups using *t* tests for continuous variables and  $\chi^2$  tests for dichotomous and categorical variables. We also compared the number of outcomes and the proportion of each group with each outcome that occurred any time during follow-up using  $\chi^2$  tests.

We compared multivariable-adjusted incidence rates and rate ratios (RRs) of the outcomes between the TG groups using generalized linear models with Poisson errors (log-link) with follow-up time as an offset variable (to account for differential follow-up). We conducted univariate Cox regression analyses of the association among all candidate variables (see Table 1) and the primary composite outcome. Variables that were significant at  $P < 0.05$  were included as potential covariates in multivariable models. From these, we used forward selection to define our multivariable analyses; final incidence models were adjusted for age, sex, race/ethnicity, BMI, smoking status, blood pressure, diabetes, use of insulin, history of MI, stroke or other ischemic heart disease, serum creatinine, and study site. To explore the robustness of our results, we re-estimated the final models for prespecified dichotomous stratifications of age (<65 vs  $\geq$ 65 years), sex, race (white vs black), Hispanic ethnicity, smoking status, blood pressure (<140/90 vs  $\geq$ 140/90 mmHg), high-density lipoprotein cholesterol (HDL-C; <40

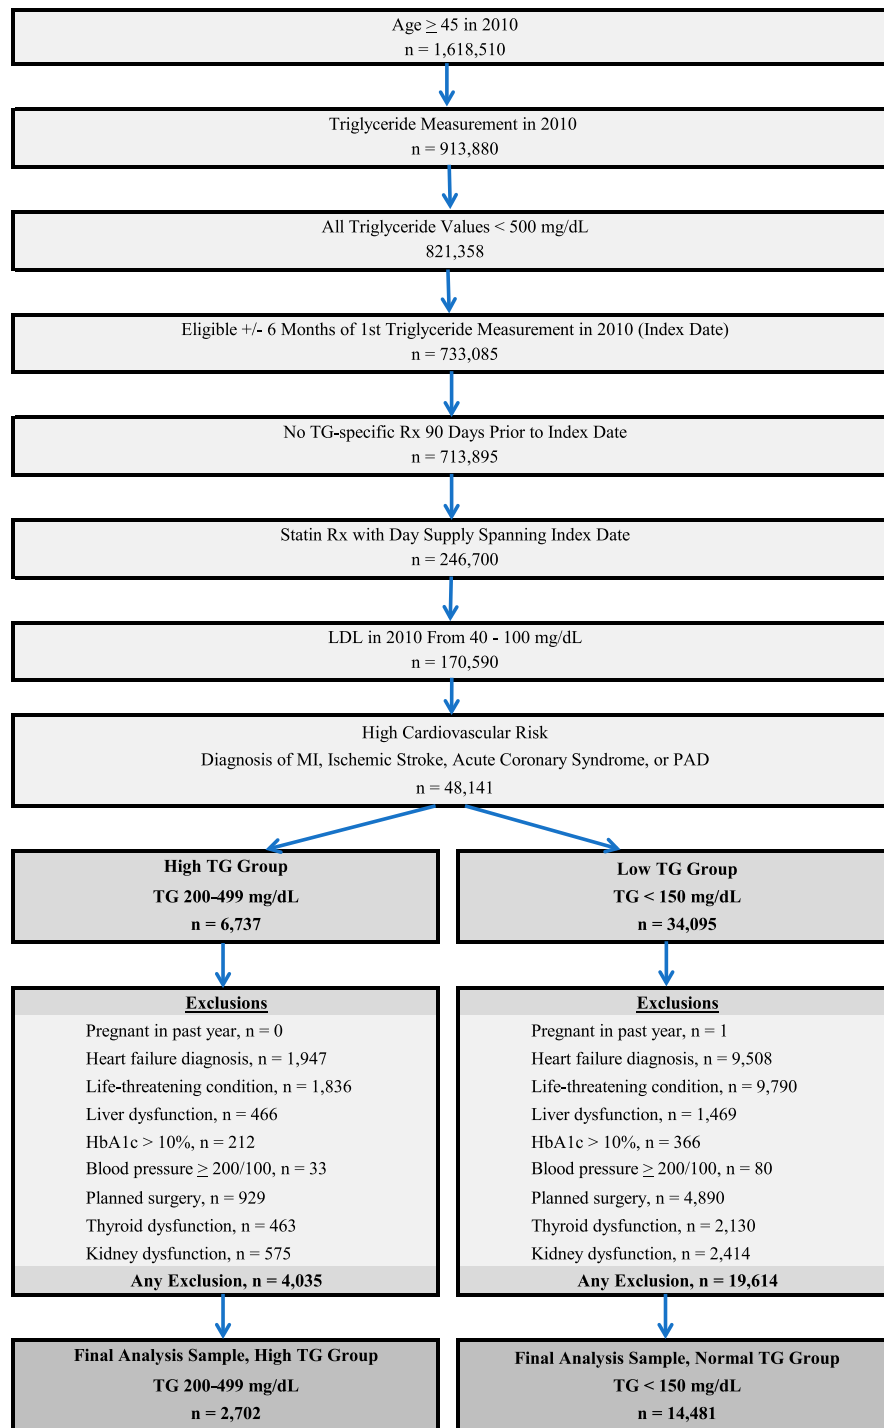

**Figure 1.** Consort diagram of the application of REDUCE-IT-like inclusion and exclusion criteria. PAD, peripheral artery disease; Rx, prescription.

vs  $\geq 40$  mg/dL), diabetes, and chronic kidney disease [CKD; estimated glomerular filtration rate (eGFR)  $< 60$  vs  $\geq 60$  mL/min/ $1.73$  m $^2$ ]. All analyses were conducted using SAS version 9.4 (SAS Institute, Cary, NC).

## Results

Patients in the high TG group ( $n = 2702$ ) were significantly different from patients in the normal TG group ( $n = 14,481$ ); they were younger and more likely to be

white or Hispanic, to smoke, to have lower HDL-C levels, and to have a higher prevalence of diabetes and CKD (Table 1). The crude prevalence of the composite outcomes at any time during follow-up did not differ between groups (Table 2; 24.4% vs 25.4%,  $P = 0.272$  for the first composite; 26.3% vs 27.0%,  $P = 0.478$  for the second composite). However, patients in the high TG group were more likely to experience a nonfatal MI (6.3% vs 5.2%,  $P = 0.023$ ) and either coronary (7.7% vs

**Table 1. Baseline Characteristics of Patients With High vs Normal TGs**

|                                                | TG, 200–499 mg/dL | TG, <150 mg/dL    | P Value <sup>a</sup> |
|------------------------------------------------|-------------------|-------------------|----------------------|
| n                                              | 2702              | 14,481            | –                    |
| Age, y                                         | 66.0 (60.0, 74.0) | 70.0 (62.0, 77.0) | <0.001               |
| Men, %                                         | 1698 (62.8)       | 9302 (64.2)       | 0.166                |
| Race/ethnicity, %                              |                   |                   | <0.001               |
| Hispanic—all races                             | 551 (20.4)        | 2562 (17.7)       |                      |
| Non-Hispanic white                             | 1759 (65.1)       | 8306 (57.4)       |                      |
| Non-Hispanic black                             | 84 (3.1)          | 2154 (14.9)       |                      |
| Non-Hispanic Asian                             | 261 (9.7)         | 1249 (8.6)        |                      |
| Other non-Hispanic                             | 47 (1.7)          | 210 (1.5)         |                      |
| Current smoker, %                              | 268 (9.9)         | 1048 (7.2)        | <0.001               |
| BMI, kg/m <sup>2</sup>                         | 30.4 (27.1, 34.3) | 27.9 (24.9, 31.6) | <0.001               |
| Systolic blood pressure, mm Hg                 | 130 (121, 138)    | 129 (120, 137)    | <0.001               |
| Diastolic blood pressure, mm Hg                | 71 (65, 76)       | 69 (64, 75)       | <0.001               |
| TG, mg/dL                                      | 243 (216, 282)    | 97 (77, 118)      | <0.001               |
| LDL-C, mg/dL                                   | 76 (64, 87)       | 77 (66, 87)       | 0.007                |
| HDL-C, mg/dL                                   | 40 (35, 46)       | 48 (41, 58)       | <0.001               |
| MI, %                                          | 801 (29.6)        | 4413 (30.5)       | 0.389                |
| Stroke, %                                      | 364 (13.5)        | 2200 (15.2)       | 0.021                |
| Unstable angina, %                             | 60 (2.2)          | 365 (2.5)         | 0.357                |
| Other ischemic heart disease, %                | 1225 (45.3)       | 6833 (47.2)       | 0.077                |
| CKD, % (eGFR, <60 mL/min/1.73 m <sup>2</sup> ) | 917 (33.9)        | 4255 (29.4)       | <0.001               |
| Type 2 diabetes, %                             | 1351 (50.0)       | 5418 (37.4)       | <0.001               |
| Insulin, %                                     | 342 (12.7)        | 1477 (10.2)       | <0.001               |
| ACEi or ARB, %                                 | 2109 (78.1)       | 10,879 (75.1)     | 0.001                |
| Diuretic, %                                    | 934 (34.6)        | 4323 (29.9)       | <0.001               |
| β-Blocker, %                                   | 1922 (71.1)       | 9338 (64.5)       | <0.001               |
| Any antihypertensive, %                        | 2572 (95.2)       | 13,588 (93.8)     | 0.006                |

Data are medians (interquartile ranges) or n (%).

Abbreviations: ACEi, angiotensin converting enzyme inhibitor; ARB, angiotensin II receptor blocker.

<sup>a</sup>P values are from Wilcoxon Sign tests for continuous measures and  $\chi^2$  tests for dichotomous and categorical variables.

5.9%,  $P < 0.001$ ) or peripheral (2.1% vs 1.6%,  $P = 0.026$ ) revascularization, whereas more patients in the normal TG group died (13.4% vs 16.0%,  $P < 0.001$ ). All of these significant findings were similarly significant for men, but only the prevalence of coronary revascularization was significantly different among women.

After multivariable statistical adjustment and accounting for time to event (Table 3), the RR indicated that the high TG group was 10% more likely to experience the second composite outcome compared with the normal TG group [RR 1.10, 95% confidence interval (CI) 1.00 to 1.20,  $P = 0.041$ ]. The difference was driven by the rates of nonfatal MI (RR 1.20, 95% CI 1.00 to 1.45,  $P = 0.045$ ), coronary revascularization (RR 1.18, 95% CI 1.00 to 1.40,  $P = 0.045$ ), and peripheral (RR 1.56, 95% CI 1.14 to 2.13,  $P = 0.006$ ) revascularization. The incidence rate (per 1000 person-years) of the second composite was greater among the high vs normal TG group, but the CIs overlapped (50.9, 95% CI 47.0 to 55.2 vs 46.5, 95% CI 44.8 to 48.2). Incidence of the first composite outcome was not significantly different between groups, with rates of 45.9 per 1000 person-years (95% CI 42.2 to 49.9) in the high TG group and 42.8 per 1000 person-years (95% CI 41.1 to 44.5) in the normal TG group and a RR of 1.07 (95%

CI 0.98 to 1.18,  $P = 0.127$ ). Rates of all-cause mortality, nonfatal stroke, unstable angina, and aneurysm repair were elevated among the high TG group but were not significantly different from patients with normal TG levels.

With the exception of age, results for the second composite outcome were consistent across stratifications (Table 4). Only the interaction between group and age was statistically significant ( $P = 0.001$ ), with a larger effect observed among those under age 65 compared with 65 and older.

## Discussion

In this observational longitudinal cohort study of 17,183 patients with ASCVD and statin-controlled LDL-C, we found that TG levels in the 200- to 499-mg/dL range were significantly associated with CVD events over a mean follow-up of 5 years when compared with otherwise similar patients with TG levels <150 mg/dL. Because we controlled for a number of demographic and clinical risk factors, and both TG groups had LDL-C levels ranging 40 to 100 mg/dL, while on statin therapy, our results reflect differences in CVD risk that can be explained, at least in part, by the difference in TG levels.

**Table 2. Crude Prevalence (No. and %) of Study Outcomes Occurring Any Time During Follow-Up**

|                                     | All Patients      |                |                      | Men                          |                           |                      | Women                        |                           |                      |
|-------------------------------------|-------------------|----------------|----------------------|------------------------------|---------------------------|----------------------|------------------------------|---------------------------|----------------------|
|                                     | TG, 200–499 mg/dL | TG, <150 mg/dL | P Value <sup>a</sup> | TG, 200–499 mg/dL (n = 1698) | TG, <150 mg/dL (n = 9302) | P Value <sup>a</sup> | TG, 200–499 mg/dL (n = 1004) | TG, <150 mg/dL (n = 5179) | P Value <sup>a</sup> |
| Mean follow-up, y (SD) <sup>b</sup> | 4.9 (1.9)         | 5.0 (1.9)      | 0.001                | 4.9 (1.9)                    | 5.0 (1.9)                 | 0.080                | 4.9 (1.9)                    | 5.1 (1.8)                 | 0.002                |
| Primary composite outcomes          |                   |                |                      |                              |                           |                      |                              |                           |                      |
| First composite outcome             | 660<br>24.4%      | 3682<br>25.4%  | 0.272                | 417<br>24.6%                 | 2408<br>25.9%             | 0.249                | 243<br>24.2%                 | 1274<br>24.6%             | 0.790                |
| Second composite outcome            | 711<br>26.3%      | 3906<br>27.0%  | 0.478                | 452<br>26.6%                 | 2563<br>27.6%             | 0.428                | 259<br>1.6%                  | 1343<br>25.9%             | 0.929                |
| Secondary outcomes                  |                   |                |                      |                              |                           |                      |                              |                           |                      |
| Nonfatal MI                         | 169<br>6.3%       | 750<br>5.2%    | 0.023                | 116<br>6.8%                  | 519<br>5.6%               | 0.042                | 53<br>5.3%                   | 231<br>4.5%               | 0.257                |
| Nonfatal stroke                     | 129<br>4.8%       | 736<br>5.1%    | 0.501                | 72<br>4.2%                   | 451<br>4.8%               | 0.279                | 57<br>5.7%                   | 285<br>5.5%               | 0.825                |
| Unstable angina                     | 35<br>1.3%        | 154<br>1.1%    | 0.289                | 24<br>1.4%                   | 115<br>1.2%               | 0.548                | 11<br>1.1%                   | 39<br>0.8%                | 0.267                |
| Coronary revascularization          | 208<br>7.7%       | 857<br>5.9%    | <0.001               | 153<br>9.0%                  | 681<br>7.3%               | 0.016                | 55<br>5.5%                   | 176<br>3.4%               | 0.002                |
| Peripheral revascularization        | 58<br>2.1%        | 225<br>1.6%    | 0.026                | 41<br>2.4%                   | 164<br>1.8%               | 0.068                | 17<br>1.7%                   | 61<br>1.2%                | 0.181                |
| Aneurysm repair                     | 21<br>0.8%        | 123<br>0.8%    | 0.706                | 17<br>1.0%                   | 98<br>1.1%                | 0.845                | 4<br>0.4%                    | 25<br>0.5%                | 0.721                |
| All-cause mortality                 | 363<br>13.4%      | 2321<br>16.0%  | <0.001               | 210<br>12.4%                 | 1430<br>15.4%             | 0.001                | 153<br>15.2%                 | 891<br>17.2%              | 0.128                |

<sup>a</sup>P values based on  $\chi^2$  tests.

<sup>b</sup>Follow-up times vary by outcome but are similar in duration and variance.

Past research spanning several decades has repeatedly identified TG as an important CVD risk factor (16), yet the contribution of TG to CVD and peripheral vascular disease risk after adjustment for other factors has been difficult to pinpoint. The Emerging Risk Factors Collaboration, an analysis of over 300,000 individuals from 68 prospective studies, found that the hazard ratio for coronary heart disease attributed to elevated TG was 1.37 (95% CI 1.31 to 1.42) after adjustment for nonlipid factors and became nonsignificant (0.99, 0.94 to 1.05) following adjustment for HDL-C and non-HDL-C (17). As very LDL particles are the main carrier of TG and are a component of non-HDL-C, this biological correlation may have resulted in statistical overcorrection (18). Moreover, all subjects were free of vascular disease at baseline, a decidedly different study population from ours. In any case, three other large meta-analyses of studies of general populations found that TG levels remained highly, significantly associated with CVD after adjustment for HDL-C, suggesting that TG are indeed acting independently as a CVD risk factor (16, 19, 20). Our results are unique in that we focused on statin-treated patients with controlled LDL-C and established ASCVD, and TG levels may play a larger role in CVD risk in this more selected, high-risk population. Furthermore, in our study, neither HDL-C nor its interaction with TG

group was an important predictor of our composite CVD outcome, further demonstrating that elevated TG levels may confer independent CVD risk.

A composite outcome that includes mortality may overemphasize less serious events, such as revascularization, especially when mortality may not be the direct result of CVD. As we did not have access to specific causes of death, we could not determine whether mortality was CV related. Despite a higher proportion of subjects in the normal TG group dying during follow-up, we did not find a substantial difference between groups in the multivariable-adjusted risk of all-cause mortality that accounted for time to event. Older age and slightly longer follow-up among patients with normal TG levels likely accounts for the difference in the crude and adjusted results. Importantly, all-cause mortality comprised 51% of the second composite outcome in the high TG group and 63% in the normal TG group. Given these findings, it may be more appropriate to consider the individual components of the composite as the better measure of CV events.

Our findings were driven by a significantly increased risk of nonfatal MI and coronary and peripheral revascularization. In unadjusted data, nonfatal MI was significantly different between the TG groups among men but not women. However, a higher (albeit nonsignificant) proportion of women in the high TG group experienced an MI, suggesting that the lack of

**Table 3. Adjusted<sup>a</sup> Incidence of Study Outcomes per 1000 Person-Years and RRs**

| Outcome                      | TG, 200–499 mg/dL   | TG, <150 mg /dL     | RR                                | P Value      |
|------------------------------|---------------------|---------------------|-----------------------------------|--------------|
| Primary composite outcomes   |                     |                     |                                   |              |
| First composite outcome      | 45.9<br>(42.2–49.9) | 42.8<br>(41.1–44.5) | 1.07<br>(0.98–1.18)               | 0.127        |
| Second composite outcome     | 50.9<br>(47.0–55.2) | 46.5<br>(44.8–48.2) | <b>1.10</b><br><b>(1.00–1.20)</b> | <b>0.041</b> |
| Secondary outcomes           |                     |                     |                                   |              |
| Nonfatal MI                  | 10.5<br>(8.9–12.4)  | 8.7<br>(8.0–9.5)    | <b>1.20</b><br><b>(1.00–1.45)</b> | <b>0.045</b> |
| Nonfatal stroke              | 8.4<br>(7.0–10.2)   | 7.8<br>(7.1–8.5)    | 1.09<br>(0.89–1.33)               | 0.423        |
| Unstable angina              | 2.3<br>(1.6–3.3)    | 1.6<br>(1.3–2.0)    | 1.39<br>(0.94–2.06)               | 0.101        |
| Coronary revascularization   | 11.9<br>(10.2–13.9) | 10.0<br>(9.3–10.9)  | <b>1.18</b><br><b>(1.00–1.40)</b> | <b>0.045</b> |
| Peripheral revascularization | 3.4<br>(2.5–4.5)    | 2.2<br>(1.8–2.6)    | <b>1.56</b><br><b>(1.14–2.13)</b> | <b>0.006</b> |
| Aneurysm repair              | 1.3<br>(0.8–2.0)    | 1.2<br>(0.9–1.5)    | 1.06<br>(0.64–1.76)               | 0.817        |
| All-cause mortality          | 20.7<br>(18.4–23.2) | 19.9<br>(18.8–21.1) | 1.04<br>(0.92–1.17)               | 0.533        |

Boldface indicates statistical significance.

<sup>a</sup>Adjusted for age, sex, race/ethnicity, BMI, smoking status, blood pressure, diabetes, use of insulin, history of MI, stroke or other ischemic heart disease, serum creatinine, and study site.

significance may have been a result of fewer events rather than sex.

It must be noted that 50% of the high TG group had a diagnosis of diabetes at baseline (vs. 38% in the normal TG group), a variable we controlled for in our

**Table 4. Adjusted<sup>a</sup> RRs (95% CI) for the High vs Normal TG Groups for Specified Stratifications and Test for Interaction**

|                                      | RR   | 95% CI    | P for Interaction |
|--------------------------------------|------|-----------|-------------------|
| Overall                              | 1.10 | 1.00–1.20 | –                 |
| <65 y                                | 1.24 | 1.04–1.47 | 0.001             |
| ≥65 y                                | 0.99 | 0.89–1.09 |                   |
| Women                                | 1.12 | 0.97–1.29 | 0.698             |
| Men                                  | 1.07 | 0.96–1.20 |                   |
| Non-Hispanic white                   | 1.15 | 1.04–1.26 | 0.598             |
| Non-Hispanic black                   | 1.03 | 0.64–1.66 |                   |
| Hispanic                             | 1.09 | 0.89–1.33 | 0.831             |
| Not Hispanic                         | 1.10 | 0.99–1.21 |                   |
| Nonsmoker                            | 1.10 | 1.01–1.21 | 0.545             |
| Current smoker                       | 1.01 | 0.77–1.31 |                   |
| BP, <140/90 mmHg                     | 1.07 | 0.97–1.18 | 0.444             |
| BP, ≥140/90 mmHg                     | 1.18 | 0.99–1.40 |                   |
| HDL-C, >40 mg/dL                     | 0.99 | 0.87–1.13 | 0.070             |
| HDL-C, ≤40 mg/dL                     | 1.08 | 0.96–1.23 |                   |
| No diabetes                          | 1.06 | 0.93–1.21 | 0.234             |
| Type 2 diabetes                      | 1.13 | 1.00–1.27 |                   |
| eGFR, ≥60 mL/min/1.73 m <sup>2</sup> | 1.14 | 1.02–1.28 | 0.313             |
| eGFR, <60 mL/min/1.73 m <sup>2</sup> | 1.07 | 0.94–1.21 |                   |

Abbreviation: BP, blood pressure.

<sup>a</sup>Adjusted for age, sex, race/ethnicity, BMI, smoking status, blood pressure, diabetes, use of insulin, history of MI, stroke or other ischemic heart disease, serum creatinine, and study site.

multivariable analyses. The known, increased risk of CV and peripheral artery disease among patients with diabetes (21, 22), coupled with our findings, suggests that hypertriglyceridemia may be of particular importance in predicting, and perhaps causing, CVD in patients with diabetes (23, 24). In addition, although clinical trials have not established that tight glycemic control reduces CVD and may even increase the risk of death (25, 26), the association between glycemic control and CVD and mortality has been demonstrated in observational studies (27, 28). However, as less than one-half of our study sample had diabetes, only 49% had a baseline measure of HbA1c, and 61% had a baseline fasting glucose recorded. The large amount of missing data precluded us from including measures of glycemia in our analyses.

Our focus was on comparing CVD events and mortality between statin-treated patients with controlled LDL-C and moderately elevated vs normal TG. Prior studies have included patients with the full range of TG levels and measured their effect either continuously, after log transformation, or by comparing dichotomized cut-points or upper and lower tertiles or quintiles of TG (10–12, 16, 19, 20, 29). Whereas these characterizations of TG levels offer important evidence of an association with CVD risk, they are of limited clinical value, as they do not align with guideline-recognized elevated ranges of TG levels (23, 30, 31). In contrast, our study focused on a level of hypertriglyceridemia that represents approximately one-fifth of the US adult population (32).

Whether elevated TG levels are a cause of or merely a biomarker for CVD cannot be established from epidemiologic or observational studies. Nevertheless, there is now mounting genetic evidence from mutational analyses, genome-wide association studies, and Mendelian randomization studies that TG abnormalities lie in the causal pathway of ASCVD (33). The elevated risk of CVD events that we observed among the statin-treated high TG group may be amenable to reduction with some TG-lowering interventions. This hypothesis is currently being tested in three large, ongoing CV outcome trials in high CV risk patients on statin therapy with specific agents that lower TG and other biomarkers (15, 34, 35).

Although an early meta-analysis found that the summary estimate of TG-associated CVD risk was greater among women than men (16), two subsequent meta-analyses did not find differences by sex (17, 19). We did not observe meaningful differences between sexes in our data. Indeed, with the exception of age, we did not observe any statistically significant interactions between TG group and the variables we tested. That the results differed by age suggests that the TG levels among older adults are less causative of CV events than among younger adults.

Strengths of our study included adequate sample size and follow-up of up to 6 years that allowed us to capture a sufficient number of events to find important differences between groups. The inclusion of a wide range of covariates allowed us to isolate the effect of the TG grouping on CVD outcomes. Our study also has notable limitations. Despite the large sample size, the detailed selection criteria could raise questions of generalizability. However, within our source population, among statin-treated patients with at least one TG measurement and LDL-C <100 mg/dL, 40% had a TG level  $\geq$ 150 mg/dL, and 23% had a TG level  $\geq$ 200 mg/dL. These findings are consistent with large CV outcome trials in which ~25% to 40% of participants had LDL-C <100 mg/dL and TG  $\geq$ 150 mg/dL, and 15% to 20% had LDL-C <100 mg/dL and TG  $\geq$ 200 mg/dL (10, 11, 36–38). We used observational laboratory data that do not contain a reliable determination of fasting status at the time of the TG tests. As we limited our data to outpatient TG results, it is likely that a majority of the tests were nonfasting. Although fasting TG may be preferred for diagnosing hypertriglyceridemia (39), nonfasting values have repeatedly been shown to predict CVD risk better (40–42). Moreover, as nonfasting TGs are substantially higher than fasting TGs (39, 43), the resulting misclassification of patients with normal fasting but high postprandial TG levels would have biased our results toward the null. Our estimates of excess CVD risk in the high TG group may therefore be conservative. By

design, we assessed CVD risk factors (including TG levels) only in the baseline year. Whether changes in TG or other lipid parameters during follow-up affected our results is not known. Real-world studies may contain inaccurate recording of health events, missing data, and uncertainty about internal validity. Despite these limitations, analysis of real-world data can, by definition, provide important information about patient risk, as seen in clinical practice (44, 45).

## Conclusions

Despite statin-controlled LDL-C levels, CV events were greater among ASCVD patients with high compared with normal TG levels, suggesting that persistent hypertriglyceridemia is associated with risk of CV outcomes in high-risk patients.

## Acknowledgments

**Financial Support:** This study was funded by Amarin Pharma, Inc.

**Correspondence and Reprint Requests:** Gregory A. Nichols, PhD, Center for Health Research, 3800 N. Interstate Avenue, Portland, Oregon 97227-1098. E-mail: [greg.nichols@kpchr.org](mailto:greg.nichols@kpchr.org).

**Disclosure Summary:** G.A.N. has unrelated funding from Boehringer-Ingelheim, Janssen Pharmaceuticals, and Sanofi. S.P. and C.B.G. are employees of Amarin. K.R. has unrelated funding from Amgen and Regeneron. S.F. has consulted for Amarin, Amgen, Pfizer, Kowa, and Merck & Co.

## References

- Preis SR, Hwang SJ, Coady S, Pencina MJ, D'Agostino RB Sr, Savage PJ, Levy D, Fox CS. Trends in all-cause and cardiovascular disease mortality among women and men with and without diabetes mellitus in the Framingham Heart Study, 1950 to 2005. *Circulation*. 2009;119(13):1728–1735.
- Yeh RW, Sidney S, Chandra M, Sorel M, Selby JV, Go AS. Population trends in the incidence and outcomes of acute myocardial infarction. *N Engl J Med*. 2010;362(23):2155–2165.
- Rosamond WD, Chambless LE, Heiss G, Mosley TH, Coresh J, Whitsel E, Wagenknecht L, Ni H, Folsom AR. Twenty-two-year trends in incidence of myocardial infarction, coronary heart disease mortality, and case fatality in 4 US communities, 1987–2008. *Circulation*. 2012;125(15):1848–1857.
- Gregg EW, Cheng YJ, Saydah S, Cowie C, Garfield S, Geiss L, Barker L. Trends in death rates among U.S. adults with and without diabetes between 1997 and 2006: findings from the National Health Interview Survey. *Diabetes Care*. 2012;35(6):1252–1257.
- Preis SR, Pencina MJ, Hwang SJ, D'Agostino RB Sr, Savage PJ, Levy D, Fox CS. Trends in cardiovascular disease risk factors in individuals with and without diabetes mellitus in the Framingham Heart Study. *Circulation*. 2009;120(3):212–220.
- Benjamin EJ, Blaha MJ, Chiuve SE, Cushman M, Das SR, Deo R, de Ferranti SD, Floyd J, Fornage M, Gillespie C, Isasi CR, Jiménez MC, Jordan LC, Judd SE, Lackland D, Lichtman JH, Lisabeth L, Liu S, Longenecker CT, Mackey RH, Matsushita K, Mozaffarian D, Mussolino ME, Nasir K, Neumar RW, Palaniappan L, Pandey

- DK, Thiagarajan RR, Reeves MJ, Ritchey M, Rodriguez CJ, Roth GA, Rosamond WD, Sasson C, Towfighi A, Tsao CW, Turner MB, Virani SS, Voeks JH, Willey JZ, Wilkins JT, Wu JH, Alger HM, Wong SS, Muntner P; American Heart Association Statistics Committee and Stroke Statistics Subcommittee. Heart Disease and Stroke Statistics—2017 Update: a report from the American Heart Association [published erratum appears in *Circulation*. 2017; 135(10):e646]. *Circulation*. 2017;135(10):e146–e603.
7. Dwyer-Lindgren L, Bertozzi-Villa A, Stubbs RW, Morozoff C, Kutz MJ, Huynh C, Barber RM, Shackelford KA, Mackenbach JP, van Lenthe FJ, Flaxman AD, Naghavi M, Mokdad AH, Murray CJUS. US county-level trends in mortality rates for major causes of death, 1980–2014. *JAMA*. 2016;316(22):2385–2401.
  8. Jellinger PS, Handelsman Y, Rosenblit PD, Bloomgarden ZT, Fonseca VA, Garber AJ, Grunberger G, Guerin CK, Bell DSH, Mechanick JI, Pessah-Pollack R, Wyne K, Smith D, Brinton EA, Fazio S, Davidson M. American Association of Clinical Endocrinologists and American College of Endocrinology Guidelines for Management of Dyslipidemia and Prevention of Cardiovascular Disease. *Endocr Pract*. 2017;23(Suppl 2):1–87.
  9. Kastelein JJP, van der Steeg WA, Holme I, Gaffney M, Cater NB, Barter P, Deedwania P, Olsson AG, Boekholdt SM, Demicco DA, Szarek M, LaRosa JC, Pedersen TR, Grundy SM; TNT Study Group; IDEAL Study Group. Lipids, apolipoproteins, and their ratios in relation to cardiovascular events with statin treatment. *Circulation*. 2008;117(23):3002–3009.
  10. Miller M, Cannon CP, Murphy SA, Qin J, Ray KK, Braunwald E; PROVE IT-TIMI 22 Investigators. Impact of triglyceride levels beyond low-density lipoprotein cholesterol after acute coronary syndrome in the PROVE IT-TIMI 22 trial. *J Am Coll Cardiol*. 2008;51(7):724–730.
  11. Faergeman O, Holme I, Fayyad R, Bhatia S, Grundy SM, Kastelein JJ, LaRosa JC, Larsen ML, Lindahl C, Olsson AG, Tikkanen MJ, Waters DD, Pedersen TR; Steering Committees of IDEAL and TNT Trials. Plasma triglycerides and cardiovascular events in the treating to new targets and incremental decrease in end-points through aggressive lipid lowering trials of statins in patients with coronary artery disease. *Am J Cardiol*. 2009;104(4):459–463.
  12. Schwartz GG, Abt M, Bao W, DeMicco D, Kallend D, Miller M, Mundl H, Olsson AG. Fasting triglycerides predict recurrent ischemic events in patients with acute coronary syndrome treated with statins [published erratum appears in *J Am Coll Cardiol*. 2015;66(3):334]. *J Am Coll Cardiol*. 2015;65(21):2267–2275.
  13. Nordestgaard BG. Triglyceride-rich lipoproteins and atherosclerotic cardiovascular disease: new insights from epidemiology, genetics, and biology. *Circ Res*. 2016;118(4):547–563.
  14. Ross TR, Ng D, Brown JS, Pardee R, Hornbrook MC, Hart G, Steiner JF. The HMO Research Network Virtual Data Warehouse: a public data model to support collaboration. *EGEMS (Wash DC)*. 2014;2(1):1049.
  15. Bhatt DL, Steg PG, Brinton EA, Jacobson TA, Miller M, Tardif JC, Ketchum SB, Doyle RT Jr, Murphy SA, Soni PN, Braeckman RA, Juliano RA, Ballantyne CM; REDUCE-IT Investigators. Rationale and design of REDUCE-IT: Reduction of Cardiovascular Events with Icosapent Ethyl-Intervention Trial. *Clin Cardiol*. 2017;40(3):138–148.
  16. Hokanson JE, Austin MA. Plasma triglyceride level is a risk factor for cardiovascular disease independent of high-density lipoprotein cholesterol level: a meta-analysis of population-based prospective studies. *J Cardiovasc Risk*. 1996;3(2):213–219.
  17. Di Angelantonio E, Sarwar N, Perry P, Kaptoge S, Ray KK, Thompson A, Wood AM, Lewington S, Sattar N, Packard CJ, Collins R, Thompson SG, Danesh J; Emerging Risk Factors Collaboration. Major lipids, apolipoproteins, and risk of vascular disease. *JAMA*. 2009;302(18):1993–2000.
  18. Tenenbaum A, Klempfner R, Fisman EZ. Hypertriglyceridemia: a too long unfairly neglected major cardiovascular risk factor. *Cardiovasc Diabetol*. 2014;13(1):159.
  19. Sarwar N, Danesh J, Eiriksdottir G, Sigurdsson G, Wareham N, Bingham S, Boekholdt SM, Khaw KT, Gudnason V. Triglycerides and the risk of coronary heart disease: 10,158 incident cases among 262,525 participants in 29 Western prospective studies. *Circulation*. 2007;115(4):450–458.
  20. Patel A, Barzi F, Jamrozik K, Lam TH, Ueshima H, Whitlock G, Woodward M; Asia Pacific Cohort Studies Collaboration. Serum triglycerides as a risk factor for cardiovascular diseases in the Asia-Pacific region. *Circulation*. 2004;110(17):2678–2686.
  21. American Diabetes Association. 10. Microvascular complications and foot care: *Standards of Medical Care in Diabetes-2018*. *Diabetes Care*. 2018;41(Suppl 1):S105–S118.
  22. American Diabetes Association. 9. Cardiovascular disease and risk management: *Standards of Medical Care in Diabetes-2018*. *Diabetes Care*. 2018;41(Suppl 1):S86–S104.
  23. Miller M, Stone NJ, Ballantyne C, Bittner V, Criqui MH, Ginsberg HN, Goldberg AC, Howard WJ, Jacobson MS, Kris-Etherton PM, Lennie TA, Levi M, Mazzone T, Pennathur S; American Heart Association Clinical Lipidology, Thrombosis, and Prevention Committee of the Council on Nutrition, Physical Activity, and Metabolism; Council on Arteriosclerosis, Thrombosis and Vascular Biology; Council on Cardiovascular Nursing; Council on the Kidney in Cardiovascular Disease. Triglycerides and cardiovascular disease: a scientific statement from the American Heart Association. *Circulation*. 2011;123(20):2292–2333.
  24. Valdivielso P, Ramírez-Bollero J, Pérez-López C. Peripheral arterial disease, type 2 diabetes and postprandial lipidaemia: is there a link? *World J Diabetes*. 2014;5(5):577–585.
  25. Patel A, MacMahon S, Chalmers J, Neal B, Billot L, Woodward M, Marre M, Cooper M, Glasziou P, Grobbee D, Hamet P, Harrap S, Heller S, Liu L, Mancia G, Mogensen CE, Pan C, Poulter N, Rodgers A, Williams B, Bompont S, de Galan BE, Joshi R, Travert F; ADVANCE Collaborative Group. Intensive blood glucose control and vascular outcomes in patients with type 2 diabetes. *N Engl J Med*. 2008;358(24):2560–2572.
  26. Gerstein HC, Miller ME, Byington RP, Goff DC Jr, Bigger JT, Buse JB, Cushman WC, Genuth S, Ismail-Beigi F, Grimm RH Jr, Probstfield JL, Simons-Morton DG, Friedewald WT; Action to Control Cardiovascular Risk in Diabetes Study Group. Effects of intensive glucose lowering in type 2 diabetes. *N Engl J Med*. 2008;358(24):2545–2559.
  27. Currie CJ, Peters JR, Tynan A, Evans M, Heine RJ, Bracco OL, Zagar T, Poole CD. Survival as a function of HbA(1c) in people with type 2 diabetes: a retrospective cohort study. *Lancet*. 2010;375(9713):481–489.
  28. Nichols GA, Joshua-Gotlib S, Parasuraman S. Glycemic control and risk of cardiovascular disease hospitalization and all-cause mortality. *J Am Coll Cardiol*. 2013;62(2):121–127.
  29. Assmann G, Schulte H. Relation of high-density lipoprotein cholesterol and triglycerides to incidence of atherosclerotic coronary artery disease (the PROCAM experience). Prospective Cardiovascular Münster study. *Am J Cardiol*. 1992;70(7):733–737.
  30. Berglund L, Brunzell JD, Goldberg AC, Goldberg IJ, Sacks F, Murad MH, Stalenhoef AF; Endocrine Society. Evaluation and treatment of hypertriglyceridemia: an Endocrine Society clinical practice guideline. *J Clin Endocrinol Metab*. 2012;97(9):2969–2989.
  31. Expert Panel on Detection, Evaluation, and Treatment of High Blood Cholesterol in Adults. Executive summary of the third report of The National Cholesterol Education Program (NCEP) Expert Panel on Detection, Evaluation, and Treatment of High Blood Cholesterol in Adults (Adult Treatment Panel III). *JAMA*. 2001;285(19):2486–2497.
  32. Ford ES, Li C, Zhao G, Pearson WS, Mokdad AH. Hypertriglyceridemia and its pharmacologic treatment among US adults. *Arch Intern Med*. 2009;169(6):572–578.



33. Budoff M. Triglycerides and triglyceride-rich lipoproteins in the causal pathway of cardiovascular disease. *Am J Cardiol.* 2016; **118**(1):138–145.
34. ClinicalTrials.gov. Outcomes Study to Assess STatin Residual Risk Reduction With EpaNova in HiGh CV Risk PatientS With Hypertriglyceridemia (STRENGTH). Accessed 2017. [clinicaltrials.gov/ct2/show/NCT02104817](https://clinicaltrials.gov/ct2/show/NCT02104817).
35. ClinicalTrials.gov. PemaFibrate to Reduce Cardiovascular Outcomes by Reducing Triglycerides IN patiENts With diabeTes (PROMINENT). Accessed 2017. [clinicaltrials.gov/ct2/show/NCT03071692](https://clinicaltrials.gov/ct2/show/NCT03071692).
36. Landray MJ, Haynes R, Hopewell JC, Parish S, Aung T, Tomson J, Wallendszus K, Craig M, Jiang L, Collins R, Armitage J; HPS2-THRIVE Collaborative Group. Effects of extended-release niacin with laropiprant in high-risk patients. *N Engl J Med.* 2014;**371**(3):203–212.
37. Ginsberg HN, Elam MB, Lovato LC, Crouse JR III, Leiter LA, Linz P, Friedewald WT, Buse JB, Gerstein HC, Probstfield J, Grimm RH, Ismail-Beigi F, Bigger JT, Goff DC Jr, Cushman WC, Simons-Morton DG, Byington RP; ACCORD Study Group. Effects of combination lipid therapy in type 2 diabetes mellitus. *N Engl J Med.* 2010;**362**(17):1563–1574.
38. Guyton JR, Slee AE, Anderson T, Fleg JL, Goldberg RB, Kashyap ML, Marcovina SM, Nash SD, O'Brien KD, Weintraub WS, Xu P, Zhao XQ, Boden WE. Relationship of lipoproteins to cardiovascular events: the AIM-HIGH Trial (Atherothrombosis Intervention in Metabolic Syndrome with Low HDL/High Triglycerides and Impact on Global Health Outcomes). *J Am Coll Cardiol.* 2013; **62**(17):1580–1584.
39. Driver SL, Martin SS, Gluckman TJ, Clary JM, Blumenthal RS, Stone NJ. Fasting or nonfasting lipid measurements: it depends on the question. *J Am Coll Cardiol.* 2016;**67**(10):1227–1234.
40. Bansal S, Buring JE, Rifai N, Mora S, Sacks FM, Ridker PM. Fasting compared with nonfasting triglycerides and risk of cardiovascular events in women. *JAMA.* 2007;**298**(3):309–316.
41. Mora S, Rifai N, Buring JE, Ridker PM. Fasting compared with nonfasting lipids and apolipoproteins for predicting incident cardiovascular events. *Circulation.* 2008;**118**(10):993–1001.
42. Eberly LE, Stamler J, Neaton JD; Multiple Risk Factor Intervention Trial Research Group. Relation of triglyceride levels, fasting and nonfasting, to fatal and nonfatal coronary heart disease. *Arch Intern Med.* 2003;**163**(9):1077–1083.
43. Schaefer EJ, Audelin MC, McNamara JR, Shah PK, Tayler T, Daly JA, Augustin JL, Seman LJ, Rubenstein JJ. Comparison of fasting and postprandial plasma lipoproteins in subjects with and without coronary heart disease. *Am J Cardiol.* 2001;**88**(10):1129–1133.
44. Jarow JP, LaVange L, Woodcock J. Multidimensional evidence generation and FDA regulatory decision making: defining and using “real-world” data. *JAMA.* 2017;**318**(8):703–704.
45. Sherman RE, Anderson SA, Dal Pan GJ, Gray GW, Gross T, Hunter NL, LaVange L, Marinac-Dabic D, Marks PW, Robb MA, Shuren J, Temple R, Woodcock J, Yue LQ, Califf RM. Real-world evidence—what is it and what can it tell us? *N Engl J Med.* 2016; **375**(23):2293–2297.
